# Supplementary material
Source: Research Square preprint supplement (doi:10.21203/rs.3.rs-9498556/v1)
Supplement: Supplementary file 1 [file 72001d75515aa1480ca4c082.docx]

**Supplementary materials**

Table S1. The top 10 countries, institutions and authors for frequency of co-occurrence.

| **CoF** | **Year** | **Country** |  | **CoF** | **Year** | **Institution** |  | **CoF** | **Year** | **Author** |
| --- | --- | --- | --- | --- | --- | --- | --- | --- | --- | --- |
| 163 | 2001 | CHINA |  | 20 | 2015 | Sun Yat Sen University |  | 6 | 2006 | Becker, Heinz |
| 147 | 2000 | USA |  | 18 | 2001 | Fudan University |  | 5 | 2020 | Liu, Qian |
| 87 | 2000 | JAPAN |  | 16 | 2014 | Chinese Academy of Medical Sciences - Peking Union Medical College |  | 5 | 2011 | Oh, Jae Hwan |
| 63 | 2008 | SOUTH KOREA |  | 15 | 2008 | Assistance Publique Hopitaux Paris (APHP) |  | 5 | 2009 | Beets-tan, Regina G H |
| 57 | 2007 | ENGLAND |  | 14 | 2012 | Egyptian Knowledge Bank (EKB) |  | 4 | 2014 | Wang, Zheng |
| 57 | 2001 | ITALY |  | 14 | 2014 | Cancer Institute & Hospital - CAMS |  | 4 | 2017 | Nagtegaal, Iris D |
| 51 | 2004 | NETHERLANDS |  | 13 | 2011 | Cleveland Clinic Foundation |  | 4 | 2015 | Quirke, Philip |
| 44 | 2000 | GERMANY |  | 13 | 2014 | Peking Union Medical College |  | 4 | 2023 | Wexner, Steven D |
| 34 | 2004 | SPAIN |  | 12 | 2007 | Radboud University Nijmegen |  | 4 | 2023 | Emile, Sameh Hany |
| 25 | 2005 | FRANCE |  | 12 | 2004 | Maastricht University |  | 4 | 2008 | Adam, Rene |

CoF: Co-occurrence frequency. Year:Year of first collaboration appearance

Table S2. The top 20 subject categories and keywords burst with a burst period from beginning to 2025.

| **Subject category bursts** | | | | | **Keywords bursts** | | | | |
| --- | --- | --- | --- | --- | --- | --- | --- | --- | --- |
| Begin | End | Strength | Year | Entity | Begin | End | Strength | Year | Entity |
| 2023 | 2025 | 2.84 | 2006 | MEDICINE, GENERAL & INTERNAL | 2023 | 2025 | 4.6 | 2013 | magnetic resonance imaging |
| 2023 | 2025 | 1.1 | 2023 | NUTRITION & DIETETICS | 2023 | 2025 | 4.4 | 2023 | lymphatic metastasis |
| 2024 | 2025 | 1.1 | 2024 | MATHEMATICAL & COMPUTATIONAL BIOLOGY | 2022 | 2025 | 3.6 | 2015 | guidelines |
| 2024 | 2025 | 0.96 | 2019 | IMMUNOLOGY | 2024 | 2025 | 3.46 | 2009 | adjuvant chemotherapy |
| - | - | - | - | - | 2022 | 2025 | 3.46 | 2007 | colorectal neoplasms |
| - | - | - | - | - | 2023 | 2025 | 3.31 | 2023 | hyperthermic intraperitoneal chemotherapy |
| - | - | - | - | - | 2024 | 2025 | 3.12 | 2024 | total neoadjuvant therapy |
| - | - | - | - | - | 2021 | 2025 | 2.94 | 2012 | locally advanced rectal cancer |
| - | - | - | - | - | 2021 | 2025 | 2.92 | 2019 | robotic surgery |
| - | - | - | - | - | 2024 | 2025 | 2.87 | 2020 | involvement |
| - | - | - | - | - | 2023 | 2025 | 2.48 | 2020 | japan |
| - | - | - | - | - | 2022 | 2025 | 2.47 | 2000 | hepatic resection |
| - | - | - | - | - | 2024 | 2025 | 2.47 | 2014 | microsatellite instability |
| - | - | - | - | - | 2023 | 2025 | 2.4 | 2015 | complications |
| - | - | - | - | - | 2023 | 2025 | 2.31 | 2000 | computed tomography |
| - | - | - | - | - | 2023 | 2025 | 2.29 | 2006 | cancer |
| - | - | - | - | - | 2024 | 2025 | 2.27 | 2018 | long term outcm |
| - | - | - | - | - | 2024 | 2025 | 2.27 | 2013 | short course radiotherapy |
| - | - | - | - | - | 2024 | 2025 | 2.24 | 2024 | predictor |
| - | - | - | - | - | 2023 | 2025 | 2.19 | 2018 | hepatectomy |

Bigin: the burst’ beginning year, End: the burst’ ending year, Strength: the burst’ strength index, Year: the first appearance time, Entity: the term.

Table S3. Summary of keyword clusters for the most recent stage(2021-2025).

| **ClusterID** | **Size** | **Silhouette** | **Average Year** | **Label (LLR)** | **Representative keywords** |
| --- | --- | --- | --- | --- | --- |
| 0 | 49 | 0.597 | 2022 | local recurrence | rectal cancer; neoadjuvant chemotherapy; robotic-assisted laparoscopic surgery; tumor markes; lateral pelvic nodes | rectal neoplasms; neoadjuvant therapy; lymphatic metastasis; local neoplasm recurrence; mesorectal lymph nodes |
| 1 | 40 | 0.588 | 2022 | magnetic resonance imaging | magnetic resonance imaging; diagnostic accuracy; rectal endosonography; whole-block imaging; three-dimensional images | neoadjuvant therapy; distal resection margin; safe distance; rectal tumor; tumor regression |
| 2 | 38 | 0.609 | 2022 | liver metastasis | neoadjuvant chemotherapy; gastric cancer; neutrophil-lymphocyte ratio; response prediction marker; self-expandable metallic stent | colorectal cancer; liver metastasis; pathologic complete response ratio; colon cancer; diffusion-weighted imaging |
| 3 | 36 | 0.597 | 2022 | lymph nodes | rectal cancer; neoadjuvant therapy; treatment response; lymph node regression grade; total neoadjuvant therapy | colorectal cancer; colon cancer; number; inferior mesenteric artery; adenocarcinoma |
| 4 | 21 | 0.775 | 2022 | hipec | cytoreductive surgery; intraperitoneal chemotherapy; rectal cancer; peritoneal carcinomatosis; appendiceal cancer | peritoneal cancer index; mitomycin c; sugarbaker procedure; concerning ct features; appendiceal tumor |
| 5 | 19 | 0.77 | 2022 | neoadjuvant radiotherapy | rectal cancer; r0 resection; virtual reality; pathological complete response; inguinal lymph nodes | neoadjuvant chemotherapy; pathological complete response; neoadjuvant treatment; complete response; advanced rectal cancer |
| 6 | 17 | 0.772 | 2022 | mismatch repair | colorectal cancer; pathological features; molecular markers; epithelioid hemangioendothelioma; total neoadjuvant therapy | rectal cancer; abdominoperineal amputation; lymph nodes; low anterior resection; microsatellite instability |
| 7 | 16 | 0.733 | 2021 | robotic surgery | rectal cancer; neoadjuvant chemotherapy; robotic-assisted laparoscopic surgery; self-expandable metallic stent; male gender | colorectal cancer; robotic surgery; invasive surgery; self-expandable metallic stent; male gender |
| 8 | 8 | 0.943 | 2021 | case report | case report; advanced cecal cancer; femoral-femoral bypass; curative resection; neoadjuvant chemotherapy | colorectal cancer; deficient mismatch repair; prognostic factor; positive lymph nodes; lymph node metastasis |

Size: the number of articles in each cluster; Silhouette: the average contour value of clustering, it is generally believed that the clustering category with S > 0.5 is reasonable, and S > 0.7 means that the clustering is convincing; LLR: Log-likelihood ratio.

Table S4. The most trafficked keyword for the top five modules each year.

| **Year** | **2000** | | **2001** | **2002** | **2003** | **2004** | **2005** | **2006** | **2007** | **2008** | **2009** |
| --- | --- | --- | --- | --- | --- | --- | --- | --- | --- | --- | --- |
| Total modules | 2 | | 2 | - | 6 | 7 | 6 | - | - | 11 | - |
| module1 | alkaline_phosphatase | | colorectal_carcinoma | - | colon_cancer | neoadjuvant_chemotherapy | low_rectal_cancer | therapy | combined_modality_therapy | colonography | adjuvant_radiotherapy |
| module2 | 5_fluoro_2'_deoxyuridylate | | asymptomatic_adults | - | endorectal_ultrasound | laparoscopic_colon_resection | prognosis | complete_resection | chemotherapy | clinical_impact | lymph_nodes |
| module3 | carcinoma | | acid_induced_protoporphyrin | - | cox_2 | computed_tomography | acute_phase_reactants | preoperative_radiation_therapy | endorectal_ultrasound | lymph_node_involvement | preoperative_radiotherapy |
| module4 | colorectal_surgery | - | | - | neoadjuvant_chemotherapy | lymph_node_micrometastases | lymph_node_dissection | neoadjuvant_chemotherapy | early_rectal_cancer | lymph_nodes | prognostic_significance |
| module5 | gastric_cancer | | - | - | - | - | - | depth | prognostic_factors | adjuvant_treatment | complete_response |
| **Year** | 2010 | | 2011 | 2012 | 2013 | 2014 | 2015 | 2016 | 2017 | 2018 | 2019 |
| Total modules | 15 | | 16 | 13 | 14 | - |  |  |  |  |  |
| module1 | prognosis | | low_anterior_resection | surgical_resection | minimum_number | adjuvant_treatment | transanal_endoscopic_surgery | surgical_resection | progression | randomized_clinical_trial | retrieval |
| module2 | lymphadenectomy | | anti_vegf_therapy | 5_fluorouracil | preoperative_radiotherapy | lymph_node_dissection | curative_resection | resection_margin | advanced_rectal_cancer | chemoradiation | anastomotic_leakage |
| module3 | chemoradiation | | impact | randomized_trial | inferior_mesenteric_artery | mesorectal_excision | neoadjuvant_chemoradiation | local_excision | neoadjuvant_therapy | tumor_regression | fat_clearance |
| module4 | total_mesorectal_excision | | neoadjuvant_chemoradiation | harvest | transanal_endoscopic_microsurgery | lymph_nodes | strategy | high_risk_patients | rectal_cancer | low_rectal_cancer | learning_curve |
| module5 | surgery | | tumor_regression | adenomatous_polyps | adjuvant_therapy | fdg_pet/ct | specimens | preoperative_chemoradiation | lymph_node_metastases | hepatic_resection | chemoradiotherapy |
| **Year** | 2020 | | 2021 | 2022 | 2023 | 2024 | -2025 | - |  | - | - |
| Total modules | 15 | | 16 | 13 | 14 | 14 | -33 | - | - | - | - |
| module1 | locally_advanced_colon_cancer | | magnetic_resonance_imaging | complete_response | complications | japanese_society | survival_analysis | - | - | - | - |
| module2 | 1st_line_treatment | | total_mesorectal_excision | preoperative_chemoradiotherapy | intraperitoneal_chemotherapy | predictor | total_mesorectal_excision | - | - | - | - |
| module3 | comparing_mesorectal_excision | | radical_resection | extramural_venous_invasion | complete_mesocolic_excision | local_recurrence | high_tie | - | - | - | - |
| module4 | radiation | | robotic_surgery | pathological_complete_response | metastasis | postoperative_chemoradiotherapy | carcinoma | - | - | - | - |
| module5 | adjuvant_chemotherapy | | pathological_complete_response | log_odds | organ_preservation | long_term_outcm | guidelines | - | - | - | - |

Table S5. Summary of emerging topics.

| **ClusterID** | **Size** | **Silhouette** | **Average Year** | **Label (LLR)** | **Representative keywords** |
| --- | --- | --- | --- | --- | --- |
| 1 | 108 | 0.85 | 2017 | early rectal cancer | rectal cancer; neoadjuvant chemoradiotherapy; lateral lymph node dissection; early rectal cancer; total mesorectal excision | lateral pelvic lymph node dissection; accessible lymph node; normal resection plane; clinical management; adjuvant chemotherapy |
| 5 | 79 | 0.893 | 2020 | rectal cancer | colorectal cancer; neoadjuvant chemotherapy; colon cancer; advanced colon cancer; colorectal cancer patient | mismatch repair deficiency; neoadjuvant pembrolizumab treatment; rectal cancer; atypical pattern; management model |
| 6 | 77 | 0.865 | 2020 | adjuvant chemotherapy | rectal cancer; advanced rectal cancer; adjuvant chemotherapy; robotic lateral pelvic lymph node dissection; tata memorial | iii rectal cancer; local recurrence; lateral lymph; preoperative chemoradiotherapy; capecitabine monotherapy |
| 15 | 31 | 0.987 | 2018 | pathological feature | colorectal cancer; pathological feature; poor survival; preneoadjuvant chemoradiotherapy serum; carcinoembryonic antigen level | prognostic role; clinicopathological significance; preoperative chemotherapy; elective surgery; acute malignant colorectal obstruction |
